# Supplementary material for: Morphological and Genetic Evidence for Multiple Evolutionary Distinct Lineages in the Endangered and Commercially Exploited Red Lined Torpedo Barbs Endemic to the Western Ghats of India
Source: PLOS journal article supplement (doi:10.1371/journal.pone.0069741), 2013-07-22
Supplement: S6 (10.1371/journal.pone.0069741.s006) [file journal.pone.0069741.s006]

# LIKELIHOOD MAPPING STATISTICS

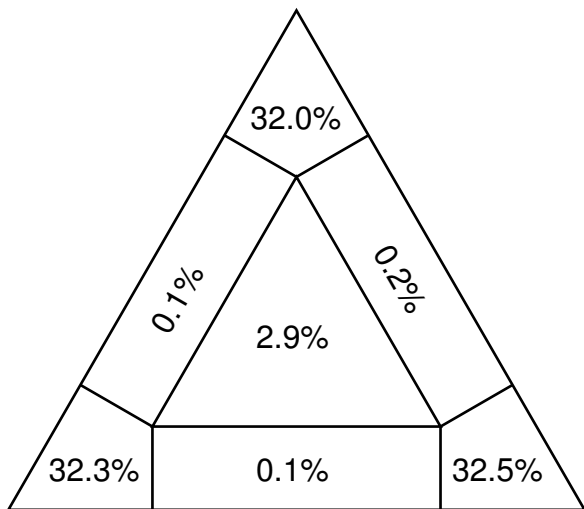

CYTB - RLTB alignment

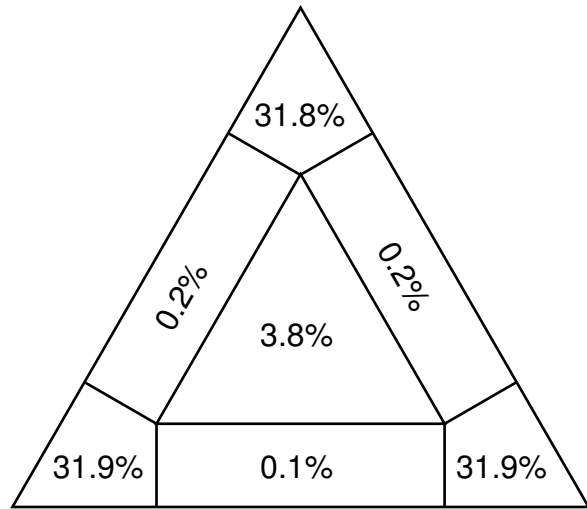

COI -RLTB alignment
