# Supplementary material for: Morphological and Genetic Evidence for Multiple Evolutionary Distinct Lineages in the Endangered and Commercially Exploited Red Lined Torpedo Barbs Endemic to the Western Ghats of India
Source: PLOS journal article supplement (doi:10.1371/journal.pone.0069741), 2013-07-22
Supplement: S15 (10.1371/journal.pone.0069741.s015) [file journal.pone.0069741.s015]

**Table S7**

**Samples procured from aquarium collectors, corresponding river systems and number of samples used**

| <b>River System<sup>@</sup></b> | <b>Collection Sites</b> | <b>n- MOR</b> | <b>n-MOL</b> |
|---------------------------------|-------------------------|---------------|--------------|
| Chandragiri/CDR <sup>1</sup>    | Sullya                  | 10            | 3            |
| Chandragiri/CDRK <sup>1</sup>   | Kottody, Nagapattinam   | 10            | 1            |
| Karyangode/KGD <sup>1</sup>     | Cherupuzha              | 10            | 2            |
| Valapattanam/VLP <sup>2</sup>   | Iritty                  | 10            | 2            |
| Bharatapuzha/KRA <sup>3</sup>   | Kanjirapuzha            | 5             | 2            |

<sup>1</sup> Collected in 2005 and 2006

<sup>2</sup> Collected in 2010

<sup>3</sup> Collected in 2008

n-MOR: number of samples used for morphological analysis.

n-MOL: number of samples used for molecular analysis.

**List of sampling sites from where we collected samples directly, corresponding river systems and number of samples used**

| <b>River System<sup>@</sup></b> | <b>Collection Sites</b>          | <b>n- MOR</b> | <b>n-MOL</b> |
|---------------------------------|----------------------------------|---------------|--------------|
| Kuttyadi/KUT <sup>\$. 1</sup>   | Chathangothunada                 | 2             | 2(1)         |
| Chaliyar/CLR <sup>\$. 2</sup>   | Chalipuzha, Pullooranpara        | 11(7)         | 2            |
| Chalakudy/CHD <sup>#. 3</sup>   | Athirapilly, Vettilapara         | 10(2)         | 3(1)         |
| Periyar/PER <sup>#. 3</sup>     | Paniyeli, Pooyamkutty            | 10(6)         | 2            |
| Periyar/PERD <sup>#. 3</sup>    | Pooyamkutty                      | 3             | 3(2)         |
| Pampa/PMB <sup>#. 3</sup>       | Angel Valley, Azhutha, Koruthodu | 9(2)          | 6(4)         |
| Achankovil/ACL <sup>#. 3</sup>  | Mukkada, Chuttipara, Kadakkola   | 5(3)          | 8(3)         |

<sup>1</sup>Collected in 2008

<sup>2</sup> Collected in 2007 and 2009

<sup>3</sup> Collected in 2010

<sup>\$</sup>no permits were required

<sup>#</sup>permits were required

n-MOR: number of samples used for morphological analysis; numbers in parenthesis denotes number of fishes released back after measurements/sampling.

n-MOL: number of samples used for molecular analysis; numbers in parenthesis denotes number of fishes released back after measurements/sampling.
